# Supplementary material for: Polydopamine-coated 3D-printed β-tricalcium phosphate scaffolds to promote the adhesion and osteogenesis of BMSCs for bone-defect repair: mRNA transcriptomic sequencing analysis
Source: Royal Society of Chemistry journal article supplement (doi:10.1039/d2tb02280j), 2023-01-01
Supplement: d2tb02280j1.pdf [file d2tb02280j1.pdf]

**Supplemental Table 1.** Primer sequences of rat genes used for qRT-PCR.

| Gene         | Forward sequence        | Reverse sequence          |
|--------------|-------------------------|---------------------------|
| <i>Runx2</i> | AACCCTTAATTTGCACTGGGTCA | CAAATTCCAGCAATGTTTGTGCTAC |
| <i>OPN</i>   | GCCGAGGTGATAGTGTGGTT    | ACTCCTCGCTTTCATGTGT       |
| <i>Col1</i>  | CGATGGATTCCAGTTCGAG     | TAGGTGATGTTCTGGGAGGC      |
| <i>BSP</i>   | TACGAACAAATAGGCAACGAGT  | TTCGTCCTCATAAGCTCGGTAA    |
| <i>GAPDH</i> | AACAGCGACACCCACTCCTC    | CATACCAGGAAATGAGCTTGACAA  |

**Supplemental Table 2.** EDS results for carbon in the different groups.

| Groups          | Weight percentage (%) | Atomic percentage (%) |
|-----------------|-----------------------|-----------------------|
| Pure TCP        | 6.46                  | 11.38                 |
| TCP@2mg/ml DOPA | 16.66                 | 28.61                 |
| TCP@4mg/ml DOPA | 27.15                 | 38.36                 |
| TCP@6mg/ml DOPA | 35.77                 | 51.37                 |



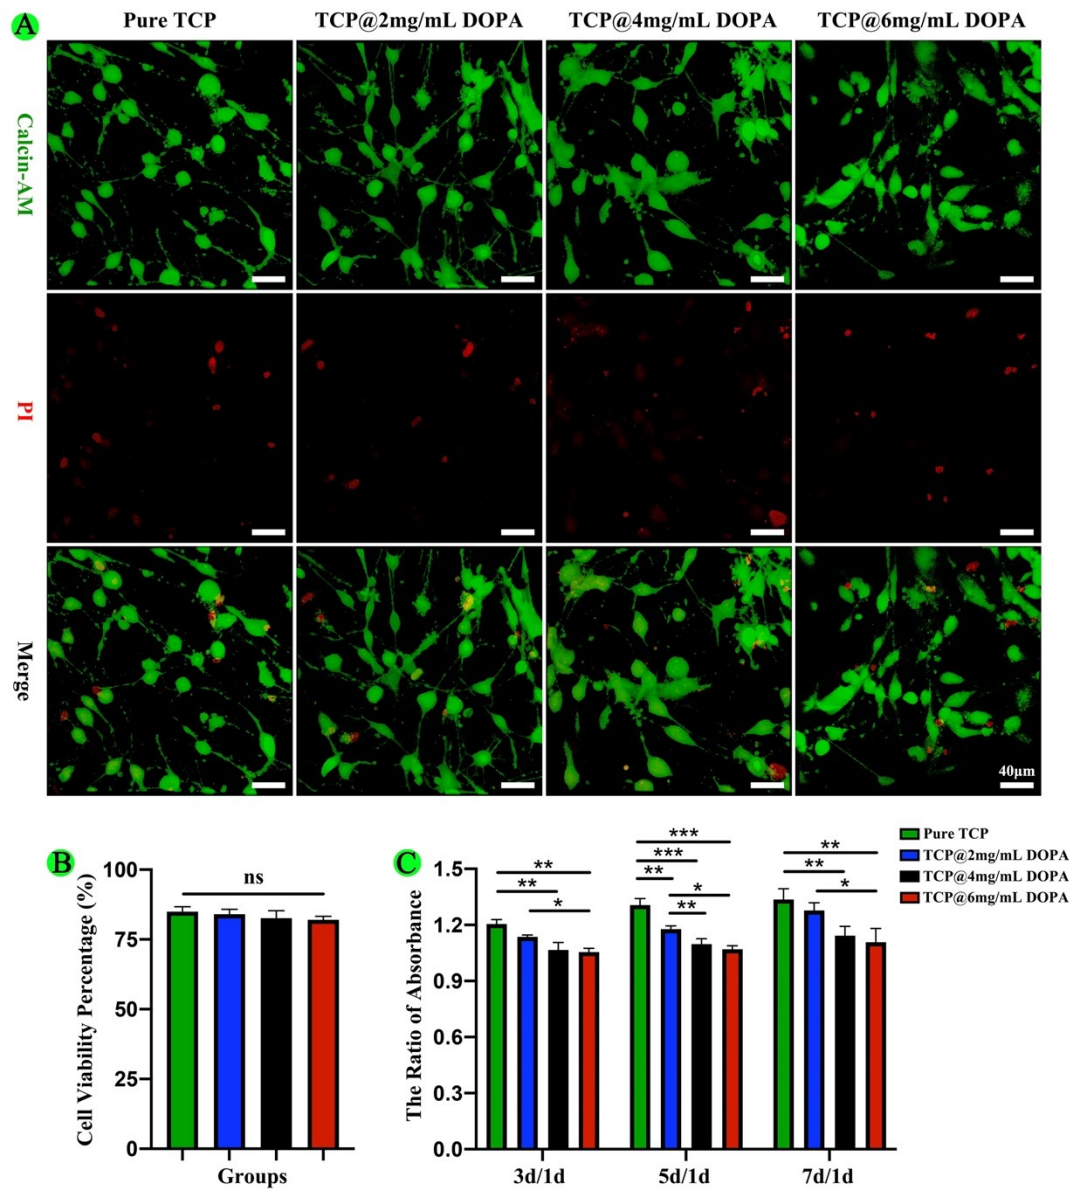

**Supplemental Figure 1.** Viability of BMSCs seeded on PDA-coated 3D-printed scaffolds. (A) Live–dead cell staining; (B) percentage cell viability; (C) CCK-8 test (\* $P < 0.05$ , \*\* $P < 0.01$ , and \*\*\* $P < 0.001$ ).

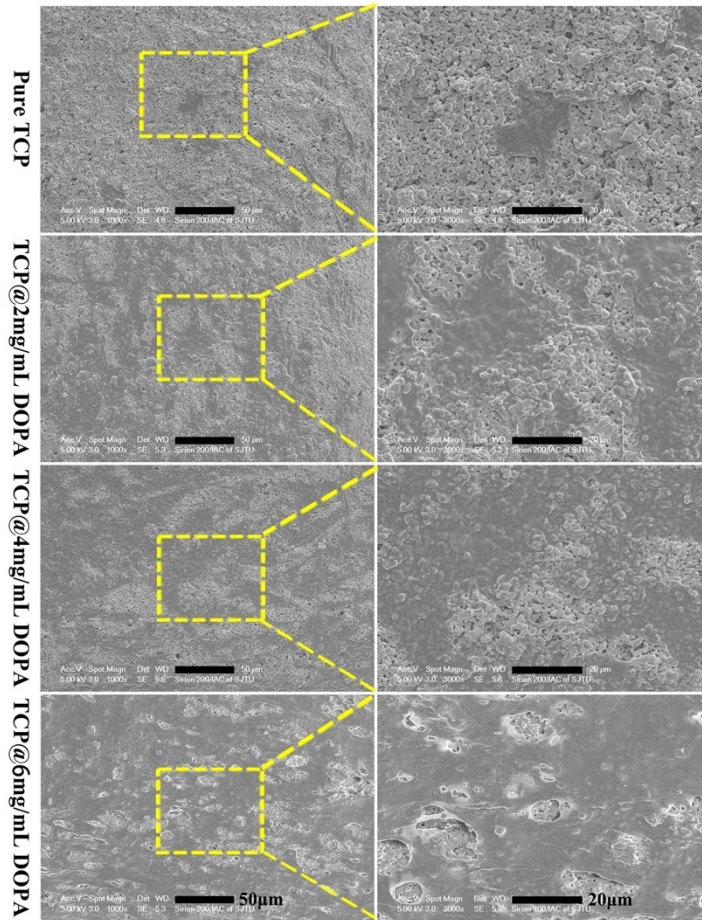

**Supplemental Figure 2.** Adhesion of BMSCs seeded on the surface of different 3D-printed scaffolds. SEM morphology of BMSCs on the surface of different groups (the wine-red marked pictures are shown in Figure 3A).

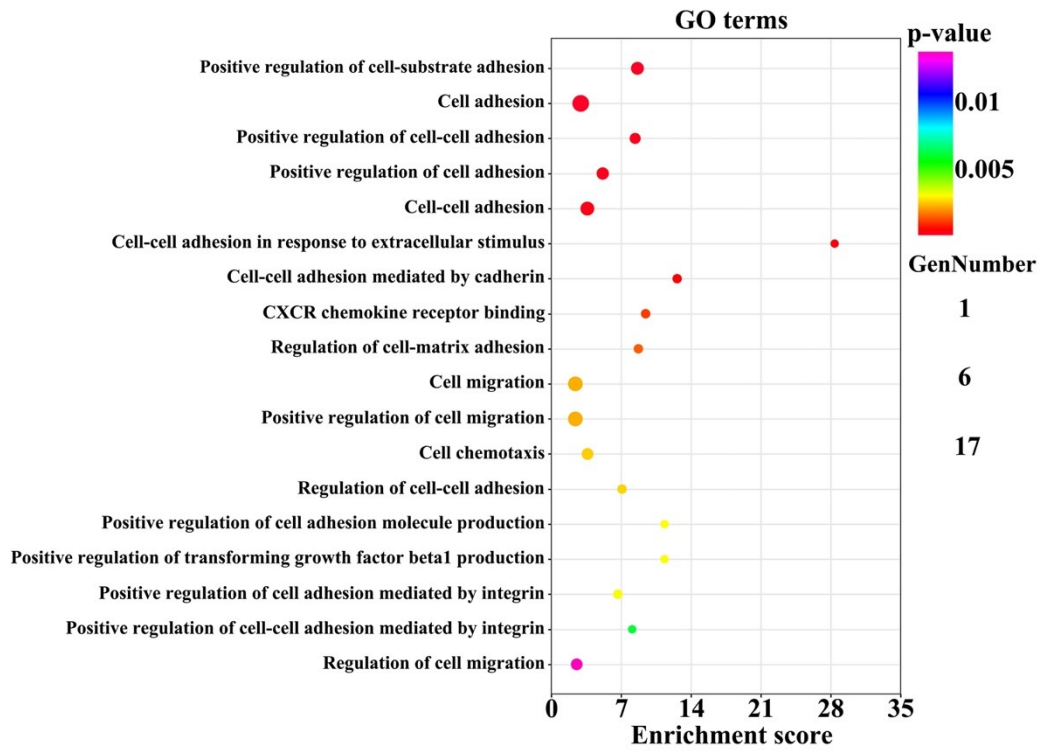

**Supplemental Figure 3.** GO terms related to the adhesion of seeded BMSCs.
